# Supplementary material for: Pedagogical translanguaging written feedback in EFL academic writing
Source: publisher site journal article supplement (doi:10.1515/applirev-2025-0026), 2025-11-04
Supplement: Supplementary file 1 [file j_applirev-2025-0026_suppl_001.pdf]

## Writing

### Appendix A: Writing prompts

Some people believe that online learning is more effective and better than face to face learning, whereas others prefer face to face learning over online learning. Which one do you prefer and why?

Discuss the benefits and drawbacks of both and state your opinions. Write a text between 150/200 words.

يعتقد بعض الناس أن التعليم عن بعد أكثر كفاءة وأفضل من التعليم الحضوري ، بينما يفضل البعض الآخر التعليم الحضوري على التعليم عن بعد. أيهما تفضل أنت؟ ولماذا؟  
ناقش مزايا وعيوب كليهما واذكر آرائك. اكتب مقال باللغة الانجليزية ما بين 150/200 كلمة.

Some people believe that online shopping is more comfortable than in store shopping, whereas others claim that online shopping is not practical and that in store shopping is much easier and more secure. Which one do you prefer and why?

Discuss the advantages and disadvantages of online shopping vs in store shopping and state your opinions. Write between 150/200 words

يعتقد بعض الناس أن التسوق عبر الإنترنت (الإلكتروني) أفضل و أكثر راحة من التسوق التقليدي (التسوق في المجمعات التجارية) ، بينما يزعم البعض الآخر أن التسوق عبر الإنترنت ليس عملياً وأن التسوق التقليدي أسهل بكثير وأكثر أماناً. ناقش مزايا وعيوب التسوق عبر الإنترنت مقابل التسوق التقليدي. أيهما تفضل أنت؟ ولماذا؟

ناقش مزايا وعيوب كليهما واذكر آرائك. اكتب ما بين 150/200 كلمة.

### Appendix B: The questionnaire

#### Section 1

Note: In the study, the questionnaire prompts were supplied in both English and Arabic. Students were instructed that they could use English, Arabic, or both in responding to open ended items.

1. How did you find the teacher’s overall feedback?

2. I provided feedback for you on two assignments on the errors that you made. The feedback was in both English and Arabic. How effective did you find this feedback in helping you learn?
  3. I provided feedback for you on two assignments on the errors that you made. The feedback was in English. How effective did you find this feedback in helping you learn?
  4. Throughout the English and Arabic feedback, the teacher elaborated and provided you with explanations of the errors that you made and how to correct them. How useful was that?
  5. Throughout the English-only feedback, the teacher elaborated and provided you with explanations of the errors that you made and how to correct them. How useful was that?
- How did you use and apply the teacher's feedback in your second draft?

#### Section 2

What type of feedback do you prefer? Arabic and English feedback or only English feedback? Explain why in one of boxes below.

#### Section 3

From a scale of 1-10, rate the difficulty/ease you had on the following. 1= very easy and 10= very difficult:

1. How much difficulty/ease did you have in understanding the overall feedback?
2. How much difficulty did you have in understanding teacher's feedback in English and Arabic together on the errors you made throughout the essay?
3. How much difficulty did you have in understanding teacher's feedback in only English on the errors you made throughout the essay?
4. How difficult/easy was to understand teacher's direct feedback?
5. How difficult/easy was to understand teacher's direct feedback with the extra short explanation?

#### Section 4

1. At the end of your essays, the teacher provided you with extra long individualized feedback using English-Only for how you can improve your essay. How effective was that?
2. At the end of your essays, the teacher provided you with extra long individualized feedback using English and Arabic for how you can improve your essay. How effective was that?
3. The teacher used English and Arabic in providing you with margin comments on the errors you made. How effective was that?
4. The teacher used English-only in providing you with margin comments on the errors you made. How effective was that?
